# Supplementary material
Source: publisher figshare collection journal article supplement (https://frontiersin.figshare.com/ndownloader/files/26444306)
Supplement: Supplementary file 1 [file 26444306]

**Table S1 :**

Background quantification and correction value for EPMA calibration, for monazites analysis.

*****************************************************************************************

**Common information:**

*File Name* : Monazite calibration with 3 & 5 Spec - 06.-01-16.qtiSet

*File Date :* May/27/16-12:4 PM

*****************************************************************************************

**Column condition:**

Cond 1 :

HV (kV) : 20

I (nA) : 200

Size (µm) : 1.

Scanning: Off

RasterLength (µm) : 60.00

*****************************************************************************************

**Xtal informations :**

*Xtal parameters:*

Al Ka Sp2 TAP (2d= 25.745 K= 0.00218)

Si Ka Sp2 TAP (2d= 25.745 K= 0.00218)

P Ka Sp4 PET (2d= 8.75 K= 0.000144)

Ca Ka Sp4 PET (2d= 8.75 K= 0.000144)

Fe Ka Sp1 LLIF (2d= 4.0267 K= 0.000058)

Y La Sp2 TAP (2d= 25.745 K= 0.00218)

La La Sp4 PET (2d= 8.75 K= 0.000144)

Ce La Sp4 PET (2d= 8.75 K= 0.000144)

Pr Lb Sp1 LLIF (2d= 4.0267 K= 0.000058)

Nd Lb Sp1 LLIF (2d= 4.0267 K= 0.000058)

Sm La Sp1 LLIF (2d= 4.0267 K= 0.000058)

Gd Lb Sp1 LLIF (2d= 4.0267 K= 0.000058)

Dy La Sp1 LLIF (2d= 4.0267 K= 0.000058)

Ho Lb Sp1 LLIF (2d= 4.0267 K= 0.000058)

Pb Ma Sp3 LPET (2d= 8.75 K= 0.000144)

Th Ma Sp3 LPET (2d= 8.75 K= 0.000144)

U Mb Sp3 LPET (2d= 8.75 K= 0.000144)

Pb Ma Sp5 LPET (2d= 8.75 K= 0.000144)

Th Ma Sp5 LPET (2d= 8.75 K= 0.000144)

U Mb Sp5 LPET (2d= 8.75 K= 0.000144)

*Pha parameters :*

Elt. Line Spec Xtal Bias Gain Dtime Blin Wind Mode

(V) (µs) (mV) (mV)

Al Ka Sp2 TAP 1308 3023 3 Inte

Si Ka Sp2 TAP 1308 3023 3 Inte

P Ka Sp4 PET 1308 1042 3 Inte

Ca Ka Sp4 PET 1308 1042 3 Inte

Fe Ka Sp1 LLIF 1315 469 3 Inte

Y La Sp2 TAP 1308 3023 3 Inte

La La Sp4 PET 1306 1011 3 Inte

Ce La Sp4 PET 1306 1011 3 Inte

Pr Lb Sp1 LLIF 1315 469 3 Inte

Nd Lb Sp1 LLIF 1315 469 3 Inte

Sm La Sp1 LLIF 1315 469 3 Inte

Gd Lb Sp1 LLIF 1315 469 3 Inte

Dy La Sp1 LLIF 1315 469 3 Inte

Ho Lb Sp1 LLIF 1315 469 3 Inte

Pb Ma Sp3 LPET 1878 1147 3 Inte

Th Ma Sp3 LPET 1878 1147 3 Inte

U Mb Sp3 LPET 1878 1147 3 Inte

Pb Ma Sp5 LPET 1325 1058 3 Inte

Th Ma Sp5 LPET 1325 1058 3 Inte

U Mb Sp5 LPET 1325 1058 3 Inte

*****************************************************************************************

**Acquisition informations :**

Elt. Line Spec Xtal Peak Pk Time Bg Off1 Bg Off2 Slope/IBg Bg Time Calibration Intensity

Time/Repeat Range #Channels (cps/nA)

Al Ka Sp2 TAP 32464 10 600 1.1 5 Albite_AlSp2_014 258.9

Si Ka Sp2 TAP 27738 10 600 1.1 5 Th Glass_SiSp2_016 777.5

P Ka Sp4 PET 70373 20 500 1.2 10 Apatite_P Sp4_018 68.3

Ca Ka Sp4 PET 38381 10 500 1.1 5 CaSiO3_CaSp4_016 381.1

Fe Ka Sp1 LLIF 48086 10 500 1.1 5 Fe2O3_FeSp1_019 483.4

Y La Sp2 TAP 25111 30 600 1 15 YAG_Y Sp2_015 421.6

La La Sp4 PET 30446 40 500 1.1 20 La Glass_LaSp4_023 40.4

Ce La Sp4 PET 29253 40 500 1.1 20 Ce Glass_CeSp4_019 40.8

Pr Lb Sp1 LLIF 56087 30 6230 1 15 REE 1_PrSp1_019 4.9

Nd Lb Sp1 LLIF 53822 30 1700 1.1 15 Nd Glass_NdSp1_026 13.3

Sm La Sp1 LLIF 54636 30 500 1.1 15 REE 3_SmSp1_013 8.5

Gd Lb Sp1 LLIF 45897 30 2000 1.1 15 REE 3_GdSp1_018 4.5

Dy La Sp1 LLIF 47408 30 400 1.1 15 REE 1_DySp1_014 8.9

Ho Lb Sp1 LLIF 40891 30 600 1.1 15 REE 2_HoSp1_019 4.8

Pb Ma Sp3 LPET 60399 240 -1000 2000 120 Crocoite_PbSp3_024 111.4

Th Ma Sp3 LPET 47274 160 600 1.1 80 Th Glass_ThSp3_020 17.2

U Mb Sp3 LPET 42445 160 -996 774 80 U Glass_U Sp3_017 12.6

Pb Ma Sp5 LPET 60424 240 -1000 2000 120 Crocoite_PbSp5_018 154.9

Th Ma Sp5 LPET 47270 160 600 1.1 80 Th Glass_ThSp5_027 11.2

U Mb Sp5 LPET 42457 160 -996 774 80 U Glass_U Sp5_032 14.3
